# Supplementary material for: Novel Paracrine Action of Endothelium Enhances Glucose Uptake in Muscle and Fat
Source: PubMed Central journal article supplement (PMC8448413; doi:10.1161/circresaha.121.319517), 2021-08-20
Supplement: res-129-720-s002.pdf [file res-129-720-s002.pdf]

## Major Resources Table

I

### Animals (in vivo studies)

| Species                                       | Vendor or Source                                           | Background Strain | Sex  | Persistent ID / URL |
|-----------------------------------------------|------------------------------------------------------------|-------------------|------|---------------------|
| Mouse: C57BL/6 strain males for WT and mIGFRO | Breeding for experimental animal is in University of Leeds | C57BL/6           | male | www.criver.com      |

### Genetically Modified Animals

|                 | Species | Vendor or Source                                           | Background Strain | Other Information                         | Persistent ID / URL |
|-----------------|---------|------------------------------------------------------------|-------------------|-------------------------------------------|---------------------|
| Parent - Male   | mouse   | Breeding for experimental animal is in University of Leeds | C57BL/6           | C57BL/6 was from Charles River, initially | criver.com          |
| Parent - Female | mouse   | Breeding for experimental animal is in University of Leeds | C57BL/6           | C57BL/6 was from Charles River, initially | genoway.com         |

### Antibodies

| Target antigen | Vendor or Source       | Catalog # | Working concentration | Persistent ID / URL                                                                                                                                                                                                                                                                                                                 |
|----------------|------------------------|-----------|-----------------------|-------------------------------------------------------------------------------------------------------------------------------------------------------------------------------------------------------------------------------------------------------------------------------------------------------------------------------------|
| eNOS           | BD Biosciences; Mouse  | #610297   | 1:1000                | <a href="https://www.bdbiosciences.com/en-us/products/reagents/microscopy-imaging-reagents/immunofluorescence-reagents/purified-mouse-anti-enos-nos-type-iii.610297">https://www.bdbiosciences.com/en-us/products/reagents/microscopy-imaging-reagents/immunofluorescence-reagents/purified-mouse-anti-enos-nos-type-iii.610297</a> |
| eNOS-pS1177    | Cell Signaling; Rabbit | #9570     | 1:1000                | <a href="https://www.cellsignal.co.uk/products/primary-antibodies/phospho-enoser1177-c9c3-rabbit-mab/9570">https://www.cellsignal.co.uk/products/primary-antibodies/phospho-enoser1177-c9c3-rabbit-mab/9570</a>                                                                                                                     |
| Akt            | BD Biosciences; Mouse  | #610861   | 1:1000                | <a href="https://www.bdbiosciences.com/en-us/products/reagents/mic">https://www.bdbiosciences.com/en-us/products/reagents/mic</a>                                                                                                                                                                                                   |

|                             |                           |          |        |                                                                                                                                                                                                                                                                                                                                       |
|-----------------------------|---------------------------|----------|--------|---------------------------------------------------------------------------------------------------------------------------------------------------------------------------------------------------------------------------------------------------------------------------------------------------------------------------------------|
|                             |                           |          |        | roscopy-imaging-reagents/immunofluorescence-reagents/purified-mouse-anti-akt.610861                                                                                                                                                                                                                                                   |
| Akt-pS473                   | Cell Signaling; Rabbit    | #4060    | 1:1000 | <a href="https://www.cellsignal.co.uk/products/primary-antibodies/phospho-akt-ser473-d9e-xp-rabbit-mab/4060">https://www.cellsignal.co.uk/products/primary-antibodies/phospho-akt-ser473-d9e-xp-rabbit-mab/4060</a>                                                                                                                   |
| ERK-phospho (Thr202/Tyr204) | Cell Signaling; Rabbit    | #9101    | 1:1000 | <a href="https://www.cellsignal.co.uk/products/primary-antibodies/phospho-p44-42-mapk-erk1-2-thr202-tyr204-antibody/9101?_=1626683098667&amp;Ntt=9101&amp;thead=true">https://www.cellsignal.co.uk/products/primary-antibodies/phospho-p44-42-mapk-erk1-2-thr202-tyr204-antibody/9101?_=1626683098667&amp;Ntt=9101&amp;thead=true</a> |
| Tubulin                     | Santa Cruz Biotech; mouse | sc-5286  | 1:3000 | <a href="https://www.scbt.com/p/alpha-tubulin-antibody-b-7">https://www.scbt.com/p/alpha-tubulin-antibody-b-7</a>                                                                                                                                                                                                                     |
| Beta-Actin                  | Santa Cruz Biotech; mouse | sc-47778 | 1:3000 | <a href="https://www.scbt.com/p/beta-actin-antibody-ac-15">https://www.scbt.com/p/beta-actin-antibody-ac-15</a>                                                                                                                                                                                                                       |
| Nox2                        | AbCam; rabbit             | ab129068 | 1:1000 | <a href="https://www.abcam.com/nox2gp91phox-antibody-epr6991-ab129068.html">https://www.abcam.com/nox2gp91phox-antibody-epr6991-ab129068.html</a>                                                                                                                                                                                     |
| Nox2                        | BD Biosciences; mouse     | #611414  | 1:1000 | <a href="https://www.bdbiosciences.com/en-us/products/reagents/microscopy-imaging-reagents/immunofluorescence-reagents/purified-mouse-anti-gp91-phox.611414">https://www.bdbiosciences.com/en-us/products/reagents/microscopy-imaging-reagents/immunofluorescence-reagents/purified-mouse-anti-gp91-phox.611414</a>                   |
| Insulin Receptor            | Cell Signaling; Rabbit    | #3025    | 1:100  | <a href="https://www.cellsignal.co.uk/products/primary-antibodies/insulin-receptor-b-4b8-rabbit-mab/3025">https://www.cellsignal.co.uk/products/primary-antibodies/insulin-receptor-b-4b8-rabbit-mab/3025</a>                                                                                                                         |
| IGF1 receptor               | Cell Signaling; Rabbit    | #9750    | 1:100  | <a href="https://www.cellsignal.co.uk/products/primary-antibodies/igf-i-receptor-b-d23h3-xp-rabbit-mab/9750">https://www.cellsignal.co.uk/products/primary-antibodies/igf-i-receptor-b-d23h3-xp-rabbit-mab/9750</a>                                                                                                                   |
| Phospho-INSR (Tyr1334)      | Thermo Fisher             | 44-809G  | 1:1000 | <a href="https://www.thermofisher.com/antibody/product/Phospho-INSR-Tyr1334-Antibody-Polyclonal/44-809G">https://www.thermofisher.com/antibody/product/Phospho-INSR-Tyr1334-Antibody-Polyclonal/44-809G</a>                                                                                                                           |

|                               |                                       |          |        |                                                                                                                                                                                                                                                                                                                                                                           |
|-------------------------------|---------------------------------------|----------|--------|---------------------------------------------------------------------------------------------------------------------------------------------------------------------------------------------------------------------------------------------------------------------------------------------------------------------------------------------------------------------------|
| Anti-Phospho - tyrosine, 4G10 | Sigma-Aldrich, Millipore              | 05-1050X | 1:2000 | <a href="https://www.sigmaaldrich.com/GB/en/product/mm/051050x">https://www.sigmaaldrich.com/GB/en/product/mm/051050x</a>                                                                                                                                                                                                                                                 |
| ECL Mouse IgG, HRP            | Amersham                              | NA931V   | 1:5000 | <a href="https://www.cytivalifesciences.com/en/us/shop/protein-analysis/blotting-and-detection/blotting-standards-and-reagents/amersham-ecl-hrp-conjugated-antibodies-p-06260#overview">https://www.cytivalifesciences.com/en/us/shop/protein-analysis/blotting-and-detection/blotting-standards-and-reagents/amersham-ecl-hrp-conjugated-antibodies-p-06260#overview</a> |
| ECL Rabbit IgG, HRP           | Amersham                              | NA934V   | 1:5000 | <a href="https://www.sigmaaldrich.com/GB/en/product/sigma/gena9341ml?gclid=Cj0KCQjwxdSHBhCdARIsAG6zhIXgbjeJpWLL4Va1TiPAo-xVjw9D-07PwRLEESEPZJUNQelUpHlu9IMaAjrVEALw_wcB">https://www.sigmaaldrich.com/GB/en/product/sigma/gena9341ml?gclid=Cj0KCQjwxdSHBhCdARIsAG6zhIXgbjeJpWLL4Va1TiPAo-xVjw9D-07PwRLEESEPZJUNQelUpHlu9IMaAjrVEALw_wcB</a>                               |
| eNOS-Ty657                    | ECM Biosciences; Rabbit               | NP4031   | 1:1000 | <a href="https://ecmbio.com/products/np4031">https://ecmbio.com/products/np4031</a>                                                                                                                                                                                                                                                                                       |
| NOX4                          | Kind gift from prof Ajay Shah; Rabbit |          | 1:2000 | Santos CX et al. EMBO J. 2016; 35:319-34                                                                                                                                                                                                                                                                                                                                  |
| ERK                           | Cell Signaling; Mouse                 | #4696    | 1:1000 | <a href="https://www.cellsignal.co.uk/products/primary-antibodies/p44-42-mapk-erk1-2-l34f12-mouse-mab/4696">https://www.cellsignal.co.uk/products/primary-antibodies/p44-42-mapk-erk1-2-l34f12-mouse-mab/4696</a>                                                                                                                                                         |

### Cultured Cells

| Name                                            | Vendor or Source         | Sex (F, M, or unknown) | Persistent ID / URL |
|-------------------------------------------------|--------------------------|------------------------|---------------------|
| Human Umbilical Vein Endothelial Cells (HUVECs) | Lonza Catalog #: CC-2935 | F                      |                     |
| Saphenous Vein Endothelial cells                | Gift of Dr Karen Porter  | F and M                |                     |

**Data & Code Availability**

| <b>Description</b>                                                                                                                                                | <b>Source /<br/>Repository</b> | <b>Persistent ID / URL</b> |
|-------------------------------------------------------------------------------------------------------------------------------------------------------------------|--------------------------------|----------------------------|
| All datasets generated or analyzed during this study are included in the published article. All data are available from the Lead Contact upon reasonable request. |                                |                            |
|                                                                                                                                                                   |                                |                            |
